# Supplementary material for: Total Serum Cholesterol and Pancreatic Cancer: A Nested Case–Control Study
Source: Oxford University Press journal article supplement (doi:10.1158/1055-9965.epi-18-0421), 2018-10-17
Supplement: 10559965epi180421-sup-200305_3_supp_5058526_pftnbr.docx [file 10559965epi180421-sup-200305_3_supp_5058526_pftnbr.docx]

**Manuscript ID EPI-18-0421R2: “Total Serum Cholesterol and Pancreatic Cancer: A Nested Case-Control Study”**

**SUPPLEMENTARY DATA**

| **Supplementary Table S1. ORs for pancreatic cancer risk associated with TSC levels.** | | | |
| --- | --- | --- | --- |
|  | **Cases** | **Controls** | **Adjusted ORb (95% CI)** |
| **Total serum cholesterola** |  |  |  |
| <4 mmol/L | 112 (9.0) | 152 (5.1) | Reference |
| 4-5 mmol/L | 350 (28.2) | 667 (22.2) | 0.85 (0.59-1.21) |
| 5-6 mmol/L | 449 (36.2) | 1168 (38.8) | 0.67 (0.47-0.95) |
| 6-7 mmol/L | 234 (18.9) | 748 (24.9) | 0.64 (0.44-0.94) |
| >7 mmol/L | 96 (7.7) | 272 (9.1) | 0.68 (0.44-1.06) |
| Continuousc | 1241 (29.2) | 3007 (70.8) | 0.92 (0.85-1.00) |
| OR, odds ratio; CI, confidence interval; TSC, total serum cholesterol. | | | |
| a Last TSC value measured in each specified time period prior to the index date of pancreatic cancer diagnosis. | | | |
| b Adjusted for obesity (BMI ≥ 30 kg/m2), ever smoking, alcohol consumption, diabetes mellitus, and aspirin use. | | | |
| c Per 1 unit (mmol/L) increase in TSC. 1 mmol/L = 38.6 mg/dL. | | |  |

| **Supplementary Table S2. ORs for pancreatic cancer risk associated with TSC levels among non-diabetics.** | | | |
| --- | --- | --- | --- |
|  | **Cases** | **Controls** | **Adjusted ORb (95% CI)** |
| **Total serum cholesterola** |  |  |  |
| <4 mmol/L | 61 (6.1) | 105 (4.3) | Reference |
| 4-5 mmol/L | 265 (26.6) | 512 (20.8) | 0.84 (0.55-1.28) |
| 5-6 mmol/L | 378 (37.9) | 983 (39.9) | 0.64 (0.42-0.97) |
| 6-7 mmol/L | 213 (21.3) | 634 (25.7) | 0.63 (0.40-0.98) |
| >7 mmol/L | 81 (8.1) | 233 (9.4) | 0.59 (0.36-0.99) |
| Continuousc | 998 (28.8) | 2,467 (71.2) | 0.91 (0.83-0.99) |
| OR, odds ratio; CI, confidence interval; TSC, total serum cholesterol | | | |
| a Last TSC value measured in each specified time period prior to the index date of pancreatic cancer diagnosis. | | | |
| b Adjusted for obesity (BMI ≥ 30 kg/m2), ever smoking, alcohol consumption, diabetes mellitus, and aspirin use. | | | |
| c Per 1 unit (mmol/L) increase in TSC. 1 mmol/L = 38.6 mg/dL. | | | |
